# Supplementary material for: Multiparametric MRI-based Habitat Analysis Integrating Deep Learning and Radiomics for Predicting Preoperative Ki-67 Expression Level in Breast Cancer
Source: Research Square preprint supplement (doi:10.21203/rs.3.rs-7709859/v1), 2025-10-26
Supplement: Supplementary file 1 [file b8ba8fd4dce11684b0d486fd.docx]

**1.MRI Scan Parameters**

**Center A (Shenzhen Longgang Central Hospital)**

- **Non-contrast T1WI**: TR 6.0 ms, TE 2.46 ms, FOV 300 mm×300 mm, slice thickness 1.5 mm, matrix 326×384.
- **Axial T2WI fat-suppressed sequence**: TR 6460 ms, TE 71 ms, FOV 300 mm×300 mm, slice thickness 4.0 mm, matrix 326×384.
- **Dynamic contrast-enhanced scanning**: TR 4.50 ms, TE 1.58 ms, FOV 300 mm×300 mm, matrix 307×384, slice thickness 1.5 mm. After non-contrast scanning, 0.2 mmol/kg of gadoteric acid meglumine was injected, followed by 20 mL of saline at 1.5 mL/s. Nine phases were scanned in total, each lasting 30 s, with a delayed scan 3 min later.
- **DWI scanning**: Single-shot echo-planar imaging with b-values of 50 and 800 s/mm². TR 3500 ms, TE 56.0 ms, FOV 173 mm×340 mm, matrix 78×200, slice thickness 5.0 mm.

**Center B (Longgang District Maternal and Child Health Hospital)**

- **Non-contrast T1WI**: TR 466 ms, TE 42 ms, FOV 360 mm×360 mm, flip angle 160°, matrix 320×192, slice thickness 5 mm, interslice spacing 1 mm.
- **Axial T2 IDEAL**: TR 6528 ms, TE 68 ms, FOV 360 mm×360 mm, flip angle 160°, matrix 320×192, slice thickness 5 mm, interslice spacing 1 mm.
- **Dynamic contrast-enhanced scans**:
  - **Dyn Ax Vibrant+C**: 31 phases (1 scout and 30 dynamic phases). TR 4.8 ms, TE 2.2 ms, FOV 320 mm×320 mm, matrix 320×320, slice thickness 2 mm, no interslice gap.
  - **Sag Vibrant+C**: TR 6.3 ms, TE 2.2 ms, FOV 180 mm×180 mm, matrix 256×160, slice thickness 2.2 mm.
  - **Ocor 3D T1 FSPGR FS+C**: TR 6.7 ms, TE 2.2 ms, FOV 380 mm×380 mm, slice thickness 3 mm.
- **DWI**: b-value 1000 s/mm². TR 6636 ms, TE 90 ms, FOV 360 mm×360 mm, matrix 128×128, slice thickness 5 mm, interslice spacing 1 mm.

**2.Eligibility criteria**

This study has been approved by the Ethics Committee of Longgang Central Hospital of Shenzhen (Shenzhen No.9 People's Hospital) (No.: 2025ECYJ087) and has been granted a waiver of informed consent.**3. Predictive Performance of the Traditional Radiomics Model in DCE-MRI**

| **model** | **model_name** | **Accuracy** | **AUC** | **95% CI** | **Sensitivity** | **Specificity** | **PPV** | **NPV** | **Precision** | **Recall** | **F1** | **Threshold** | **Task** |
| --- | --- | --- | --- | --- | --- | --- | --- | --- | --- | --- | --- | --- | --- |
| **DCE_intra** | SVM | 0.676 | 0.717 | 0.6288 - 0.8050 | 0.632 | 0.766 | 0.845 | 0.507 | 0.845 | 0.632 | 0.723 | 0.86 | label-train |
|  | SVM | 0.733 | 0.712 | 0.5500 - 0.8739 | 0.766 | 0.615 | 0.878 | 0.421 | 0.878 | 0.766 | 0.818 | 0.812 | label-test |
|  | RandomForest | 0.803 | 0.821 | 0.7477 - 0.8941 | 0.895 | 0.617 | 0.825 | 0.744 | 0.825 | 0.895 | 0.859 | 0.553 | label-train |
|  | RandomForest | 0.867 | 0.732 | 0.5577 - 0.9054 | 1 | 0.385 | 0.855 | 1 | 0.855 | 1 | 0.922 | 0.378 | label-test |
|  | ExtraTrees | 0.768 | 0.832 | 0.7632 - 0.9004 | 0.747 | 0.809 | 0.887 | 0.613 | 0.887 | 0.747 | 0.811 | 0.665 | label-train |
|  | ExtraTrees | 0.8 | 0.772 | 0.6239 - 0.9194 | 0.851 | 0.615 | 0.889 | 0.533 | 0.889 | 0.851 | 0.87 | 0.624 | label-test |
| **DCE_intra+peri5mm（image_merge）** | SVM | 0.782 | 0.796 | 0.7161 - 0.8759 | 0.863 | 0.617 | 0.82 | 0.69 | 0.82 | 0.863 | 0.841 | 0.711 | label-train |
|  | SVM | 0.633 | 0.732 | 0.5698 - 0.8934 | 0.574 | 0.846 | 0.931 | 0.355 | 0.931 | 0.574 | 0.711 | 0.72 | label-test |
|  | RandomForest | 0.754 | 0.767 | 0.6899 - 0.8440 | 0.811 | 0.638 | 0.819 | 0.625 | 0.819 | 0.811 | 0.815 | 0.75 | label-train |
|  | RandomForest | 0.55 | 0.736 | 0.6092 - 0.8622 | 0.447 | 0.923 | 0.955 | 0.316 | 0.955 | 0.447 | 0.609 | 0.778 | label-test |
|  | ExtraTrees | 0.761 | 0.763 | 0.6809 - 0.8459 | 0.853 | 0.574 | 0.802 | 0.659 | 0.802 | 0.853 | 0.827 | 0.727 | label-train |
|  | ExtraTrees | 0.8 | 0.751 | 0.6129 - 0.8896 | 0.851 | 0.615 | 0.889 | 0.533 | 0.889 | 0.851 | 0.87 | 0.727 | label-test |
| **DCE_intra+peri10mm（image_merge）** | SVM | 0.641 | 0.751 | 0.6687 - 0.8328 | 0.547 | 0.83 | 0.867 | 0.476 | 0.867 | 0.547 | 0.671 | 0.797 | label-train |
|  | SVM | 0.567 | 0.728 | 0.5719 - 0.8848 | 0.468 | 0.923 | 0.957 | 0.324 | 0.957 | 0.468 | 0.629 | 0.799 | label-test |
|  | RandomForest | 0.831 | 0.896 | 0.8398 - 0.9528 | 0.842 | 0.809 | 0.899 | 0.717 | 0.899 | 0.842 | 0.87 | 0.615 | label-train |
|  | RandomForest | 0.867 | 0.735 | 0.5690 - 0.9007 | 0.979 | 0.462 | 0.868 | 0.857 | 0.868 | 0.979 | 0.92 | 0.465 | label-test |
|  | ExtraTrees | 0.718 | 0.823 | 0.7572 - 0.8892 | 0.674 | 0.809 | 0.877 | 0.551 | 0.877 | 0.674 | 0.762 | 0.706 | label-train |
|  | ExtraTrees | 0.783 | 0.746 | 0.5838 - 0.9089 | 0.851 | 0.538 | 0.87 | 0.5 | 0.87 | 0.851 | 0.86 | 0.526 | label-test |
| **DCE_habitat** | SVM | 0.768 | 0.823 | 0.7464 - 0.8988 | 0.779 | 0.745 | 0.86 | 0.625 | 0.86 | 0.779 | 0.818 | 0.701 | label-train |
|  | SVM | 0.633 | 0.763 | 0.6297 - 0.8957 | 0.553 | 0.923 | 0.963 | 0.364 | 0.963 | 0.553 | 0.703 | 0.726 | label-test |
|  | RandomForest | 0.725 | 0.825 | 0.7526 - 0.8976 | 0.653 | 0.872 | 0.912 | 0.554 | 0.912 | 0.653 | 0.761 | 0.699 | label-train |
|  | RandomForest | 0.667 | 0.765 | 0.6427 - 0.8876 | 0.574 | 1 | 1 | 0.394 | 1 | 0.574 | 0.73 | 0.718 | label-test |
|  | ExtraTrees | 0.768 | 0.814 | 0.7408 - 0.8876 | 0.789 | 0.723 | 0.852 | 0.63 | 0.852 | 0.789 | 0.82 | 0.644 | label-train |
|  | ExtraTrees | 0.75 | 0.791 | 0.6674 - 0.9136 | 0.723 | 0.846 | 0.944 | 0.458 | 0.944 | 0.723 | 0.819 | 0.682 | label-test |
| **DCE_intra+peri5mm** | SVM | 0.69 | 0.807 | 0.7359 - 0.8780 | 0.568 | 0.936 | 0.947 | 0.518 | 0.947 | 0.568 | 0.711 | 0.989 | label-train |
|  | SVM | 0.667 | 0.746 | 0.6031 - 0.8895 | 0.617 | 0.846 | 0.935 | 0.379 | 0.935 | 0.617 | 0.744 | 0.989 | label-test |
|  | RandomForest | 0.676 | 0.8 | 0.7264 - 0.8745 | 0.547 | 0.936 | 0.945 | 0.506 | 0.945 | 0.547 | 0.693 | 0.713 | label-train |
|  | RandomForest | 0.767 | 0.755 | 0.5871 - 0.9235 | 0.809 | 0.615 | 0.884 | 0.471 | 0.884 | 0.809 | 0.844 | 0.636 | label-test |
|  | ExtraTrees | 0.873 | 0.911 | 0.8598 - 0.9619 | 0.905 | 0.809 | 0.905 | 0.809 | 0.905 | 0.905 | 0.905 | 0.624 | label-train |
|  | ExtraTrees | 0.767 | 0.818 | 0.6642 - 0.9709 | 0.745 | 0.846 | 0.946 | 0.478 | 0.946 | 0.745 | 0.833 | 0.644 | label-test |
| **DCE_intra+peri10mm** | SVM | 0.824 | 0.816 | 0.7383 - 0.8931 | 0.968 | 0.532 | 0.807 | 0.893 | 0.807 | 0.968 | 0.88 | 0.613 | label-train |
|  | SVM | 0.567 | 0.741 | 0.5972 - 0.8856 | 0.447 | 1 | 1 | 0.333 | 1 | 0.447 | 0.618 | 0.742 | label-test |
|  | RandomForest | 0.739 | 0.803 | 0.7286 - 0.8779 | 0.705 | 0.809 | 0.882 | 0.576 | 0.882 | 0.705 | 0.784 | 0.664 | label-train |
|  | RandomForest | 0.767 | 0.748 | 0.5875 - 0.9084 | 0.809 | 0.615 | 0.884 | 0.471 | 0.884 | 0.809 | 0.844 | 0.646 | label-test |
|  | ExtraTrees | 0.739 | 0.809 | 0.7353 - 0.8833 | 0.705 | 0.809 | 0.882 | 0.576 | 0.882 | 0.705 | 0.784 | 0.665 | label-train |
|  | ExtraTrees | 0.817 | 0.807 | 0.6553 - 0.9585 | 0.809 | 0.846 | 0.95 | 0.55 | 0.95 | 0.809 | 0.874 | 0.657 | label-test |
| **DCE_habitat+peri5mm** | SVM | 0.768 | 0.821 | 0.7464 - 0.8948 | 0.747 | 0.809 | 0.887 | 0.613 | 0.887 | 0.747 | 0.811 | 0.749 | label-train |
|  | SVM | 0.7 | 0.817 | 0.7105 - 0.9229 | 0.617 | 1 | 1 | 0.419 | 1 | 0.617 | 0.763 | 0.763 | label-test |
|  | RandomForest | 0.789 | 0.856 | 0.7835 - 0.9276 | 0.768 | 0.83 | 0.901 | 0.639 | 0.901 | 0.768 | 0.83 | 0.702 | label-train |
|  | RandomForest | 0.733 | 0.818 | 0.7073 - 0.9277 | 0.702 | 0.846 | 0.943 | 0.44 | 0.943 | 0.702 | 0.805 | 0.692 | label-test |
|  | ExtraTrees | 0.81 | 0.878 | 0.8190 - 0.9371 | 0.789 | 0.851 | 0.915 | 0.667 | 0.915 | 0.789 | 0.847 | 0.68 | label-train |
|  | ExtraTrees | 0.817 | 0.825 | 0.7075 - 0.9423 | 0.851 | 0.692 | 0.909 | 0.562 | 0.909 | 0.851 | 0.879 | 0.639 | label-test |
| **DCE_habitat+peri10mm** | SVM | 0.803 | 0.851 | 0.7897 - 0.9124 | 0.747 | 0.915 | 0.947 | 0.642 | 0.947 | 0.747 | 0.835 | 0.759 | label-train |
|  | SVM | 0.717 | 0.802 | 0.6751 - 0.9288 | 0.702 | 0.769 | 0.917 | 0.417 | 0.917 | 0.702 | 0.795 | 0.759 | label-test |
|  | RandomForest | 0.746 | 0.849 | 0.7868 - 0.9113 | 0.674 | 0.894 | 0.928 | 0.575 | 0.928 | 0.674 | 0.78 | 0.692 | label-train |
|  | RandomForest | 0.767 | 0.805 | 0.6920 - 0.9185 | 0.766 | 0.769 | 0.923 | 0.476 | 0.923 | 0.766 | 0.837 | 0.671 | label-test |
|  | ExtraTrees | 0.803 | 0.893 | 0.8407 - 0.9458 | 0.789 | 0.83 | 0.904 | 0.661 | 0.904 | 0.789 | 0.843 | 0.8 | label-train |
|  | ExtraTrees | 0.783 | 0.816 | 0.6534 - 0.9784 | 0.787 | 0.769 | 0.925 | 0.5 | 0.925 | 0.787 | 0.851 | 0.5 | label-test |

**4. Predictive Performance of the Traditional Radiomics Model in T2WI**

| **model** | **model_name** | **Accuracy** | **AUC** | **95% CI** | **Sensitivity** | **Specificity** | **PPV** | **NPV** | **Precision** | **Recall** | **F1** | **Threshold** | **Task** |
| --- | --- | --- | --- | --- | --- | --- | --- | --- | --- | --- | --- | --- | --- |
| **T2_intra** | SVM | 0.725 | 0.749 | 0.6633 - 0.8350 | 0.726 | 0.723 | 0.841 | 0.567 | 0.841 | 0.726 | 0.78 | 0.837 | label-train |
| SVM | 0.683 | 0.71 | 0.5449 - 0.8757 | 0.681 | 0.692 | 0.889 | 0.375 | 0.889 | 0.681 | 0.771 | 0.83 | label-test |
| RandomForest | 0.732 | 0.801 | 0.7221 - 0.8806 | 0.705 | 0.787 | 0.87 | 0.569 | 0.87 | 0.705 | 0.779 | 0.686 | label-train |
| RandomForest | 0.783 | 0.704 | 0.5460 - 0.8615 | 0.851 | 0.538 | 0.87 | 0.5 | 0.87 | 0.851 | 0.86 | 0.644 | label-test |
| ExtraTrees | 0.739 | 0.801 | 0.7232 - 0.8790 | 0.726 | 0.766 | 0.862 | 0.581 | 0.862 | 0.726 | 0.789 | 0.675 | label-train |
| ExtraTrees | 0.667 | 0.762 | 0.6156 - 0.9081 | 0.617 | 0.846 | 0.935 | 0.379 | 0.935 | 0.617 | 0.744 | 0.637 | label-test |
| **T2_intra+peri5mm**（image_merge） | SVM | 0.725 | 0.709 | 0.6102 - 0.8070 | 0.737 | 0.702 | 0.833 | 0.569 | 0.833 | 0.737 | 0.782 | 0.669 | label-train |
| SVM | 0.667 | 0.692 | 0.5536 - 0.8311 | 0.617 | 0.846 | 0.935 | 0.379 | 0.935 | 0.617 | 0.744 | 0.669 | label-test |
| RandomForest | 0.725 | 0.762 | 0.6772 - 0.8467 | 0.789 | 0.596 | 0.798 | 0.583 | 0.798 | 0.789 | 0.794 | 0.694 | label-train |
| RandomForest | 0.617 | 0.682 | 0.5392 - 0.8257 | 0.553 | 0.846 | 0.929 | 0.344 | 0.929 | 0.553 | 0.693 | 0.761 | label-test |
| ExtraTrees | 0.556 | 0.74 | 0.6564 - 0.8232 | 0.337 | 1 | 1 | 0.427 | 1 | 0.337 | 0.504 | 0.747 | label-train |
| ExtraTrees | 0.6 | 0.708 | 0.5636 - 0.8521 | 0.532 | 0.846 | 0.926 | 0.333 | 0.926 | 0.532 | 0.676 | 0.683 | label-test |
| **T2_intra+peri10mm**（image_merge） | SVM | 0.634 | 0.713 | 0.6244 - 0.8022 | 0.537 | 0.83 | 0.864 | 0.47 | 0.864 | 0.537 | 0.662 | 0.689 | label-train |
| SVM | 0.65 | 0.678 | 0.5086 - 0.8466 | 0.638 | 0.692 | 0.882 | 0.346 | 0.882 | 0.638 | 0.741 | 0.689 | label-test |
| RandomForest | 0.599 | 0.727 | 0.6436 - 0.8104 | 0.484 | 0.83 | 0.852 | 0.443 | 0.852 | 0.484 | 0.617 | 0.875 | label-train |
| RandomForest | 0.5 | 0.648 | 0.5114 - 0.7849 | 0.383 | 0.923 | 0.947 | 0.293 | 0.947 | 0.383 | 0.545 | 0.875 | label-test |
| ExtraTrees | 0.739 | 0.831 | 0.7607 - 0.9022 | 0.674 | 0.872 | 0.914 | 0.569 | 0.914 | 0.674 | 0.776 | 0.694 | label-train |
| ExtraTrees | 0.683 | 0.65 | 0.4738 - 0.8257 | 0.681 | 0.692 | 0.889 | 0.375 | 0.889 | 0.681 | 0.771 | 0.659 | label-test |
| **T2_habitat** | SVM | 0.754 | 0.8 | 0.7249 - 0.8755 | 0.747 | 0.766 | 0.866 | 0.6 | 0.866 | 0.747 | 0.802 | 1 | label-train |
| SVM | 0.7 | 0.732 | 0.5781 - 0.8851 | 0.66 | 0.846 | 0.939 | 0.407 | 0.939 | 0.66 | 0.775 | 1 | label-test |
| RandomForest | 0.852 | 0.81 | 0.7260 - 0.8934 | 0.958 | 0.638 | 0.843 | 0.882 | 0.843 | 0.958 | 0.897 | 0.576 | label-train |
| RandomForest | 0.7 | 0.721 | 0.5607 - 0.8812 | 0.681 | 0.769 | 0.914 | 0.4 | 0.914 | 0.681 | 0.78 | 0.72 | label-test |
| ExtraTrees | 0.704 | 0.771 | 0.6862 - 0.8549 | 0.684 | 0.745 | 0.844 | 0.538 | 0.844 | 0.684 | 0.756 | 0.68 | label-train |
| ExtraTrees | 0.767 | 0.77 | 0.6214 - 0.9187 | 0.787 | 0.692 | 0.902 | 0.474 | 0.902 | 0.787 | 0.841 | 0.666 | label-test |
| **T2_intra+peri5mm** | SVM | 0.817 | 0.783 | 0.6950 - 0.8701 | 0.947 | 0.553 | 0.811 | 0.839 | 0.811 | 0.947 | 0.874 | 0.642 | label-train |
| SVM | 0.65 | 0.732 | 0.5836 - 0.8795 | 0.596 | 0.846 | 0.933 | 0.367 | 0.933 | 0.596 | 0.727 | 0.747 | label-test |
| RandomForest | 0.592 | 0.739 | 0.6583 - 0.8194 | 0.463 | 0.851 | 0.863 | 0.44 | 0.863 | 0.463 | 0.603 | 0.821 | label-train |
| RandomForest | 0.533 | 0.737 | 0.6118 - 0.8628 | 0.426 | 0.923 | 0.952 | 0.308 | 0.952 | 0.426 | 0.588 | 0.821 | label-test |
| ExtraTrees | 0.775 | 0.872 | 0.8121 - 0.9326 | 0.737 | 0.851 | 0.909 | 0.615 | 0.909 | 0.737 | 0.814 | 0.707 | label-train |
| ExtraTrees | 0.833 | 0.811 | 0.6795 - 0.9424 | 0.872 | 0.692 | 0.911 | 0.6 | 0.911 | 0.872 | 0.891 | 0.677 | label-test |
| **T2_intra+peri10mm** | SVM | 0.577 | 0.731 | 0.6472 - 0.8153 | 0.389 | 0.957 | 0.949 | 0.437 | 0.949 | 0.389 | 0.552 | 0.733 | label-train |
| SVM | 0.767 | 0.718 | 0.5589 - 0.8781 | 0.83 | 0.538 | 0.867 | 0.467 | 0.867 | 0.83 | 0.848 | 0.683 | label-test |
| RandomForest | 0.711 | 0.787 | 0.7068 - 0.8663 | 0.621 | 0.894 | 0.922 | 0.538 | 0.922 | 0.621 | 0.742 | 0.731 | label-train |
| RandomForest | 0.533 | 0.715 | 0.5765 - 0.8539 | 0.404 | 1 | 1 | 0.317 | 1 | 0.404 | 0.576 | 0.76 | label-test |
| ExtraTrees | 0.782 | 0.839 | 0.7711 - 0.9062 | 0.811 | 0.723 | 0.856 | 0.654 | 0.856 | 0.811 | 0.832 | 0.684 | label-train |
| ExtraTrees | 0.7 | 0.786 | 0.6522 - 0.9206 | 0.66 | 0.846 | 0.939 | 0.407 | 0.939 | 0.66 | 0.775 | 0.7 | label-test |
| **T2_habitat+peri5mm** | SVM | 0.782 | 0.84 | 0.7688 - 0.9114 | 0.758 | 0.83 | 0.9 | 0.629 | 0.9 | 0.758 | 0.823 | 0.685 | label-train |
| SVM | 0.733 | 0.782 | 0.6571 - 0.9076 | 0.702 | 0.846 | 0.943 | 0.44 | 0.943 | 0.702 | 0.805 | 0.668 | label-test |
| RandomForest | 0.817 | 0.923 | 0.8781 - 0.9678 | 0.768 | 0.915 | 0.948 | 0.662 | 0.948 | 0.768 | 0.849 | 0.75 | label-train |
| RandomForest | 0.783 | 0.787 | 0.6493 - 0.9251 | 0.83 | 0.615 | 0.886 | 0.5 | 0.886 | 0.83 | 0.857 | 0.5 | label-test |
| ExtraTrees | 0.803 | 0.866 | 0.8018 - 0.9303 | 0.821 | 0.766 | 0.876 | 0.679 | 0.876 | 0.821 | 0.848 | 0.662 | label-train |
| ExtraTrees | 0.75 | 0.814 | 0.7080 - 0.9205 | 0.702 | 0.923 | 0.971 | 0.462 | 0.971 | 0.702 | 0.815 | 0.664 | label-test |
| **T2_habitat+peri10mm** | SVM | 0.739 | 0.791 | 0.7088 - 0.8733 | 0.737 | 0.745 | 0.854 | 0.583 | 0.854 | 0.737 | 0.791 | 0.686 | label-train |
| SVM | 0.75 | 0.771 | 0.6285 - 0.9132 | 0.702 | 0.923 | 0.971 | 0.462 | 0.971 | 0.702 | 0.815 | 0.686 | label-test |
| RandomForest | 0.845 | 0.839 | 0.7643 - 0.9143 | 0.947 | 0.638 | 0.841 | 0.857 | 0.841 | 0.947 | 0.891 | 0.602 | label-train |
| RandomForest | 0.8 | 0.725 | 0.5592 - 0.8909 | 0.83 | 0.692 | 0.907 | 0.529 | 0.907 | 0.83 | 0.867 | 0.637 | label-test |
| ExtraTrees | 0.824 | 0.872 | 0.8081 - 0.9356 | 0.768 | 0.936 | 0.961 | 0.667 | 0.961 | 0.768 | 0.854 | 0.67 | label-train |
| ExtraTrees | 0.733 | 0.804 | 0.6792 - 0.9296 | 0.681 | 0.923 | 0.97 | 0.444 | 0.97 | 0.681 | 0.8 | 0.677 | label-test |

**5.Predictive Performance of the 2.5D Deep Learning Model**

| model | model_name | Accuracy | AUC | 95% CI | Sensitivity | Specificity | PPV | NPV | Precision | Recall | F1 | Threshold | Task |
| --- | --- | --- | --- | --- | --- | --- | --- | --- | --- | --- | --- | --- | --- |
| T2_multi-channel | SVM | 0.824 | 0.843 | 0.7764 - 0.9100 | 0.874 | 0.723 | 0.865 | 0.739 | 0.865 | 0.874 | 0.869 | 0.669 | label-train |
|  | SVM | 0.7 | 0.763 | 0.6104 - 0.9149 | 0.66 | 0.846 | 0.939 | 0.407 | 0.939 | 0.66 | 0.775 | 0.677 | label-test |
|  | RandomForest | 0.81 | 0.872 | 0.8126 - 0.9318 | 0.789 | 0.851 | 0.915 | 0.667 | 0.915 | 0.789 | 0.847 | 0.612 | label-train |
|  | RandomForest | 0.667 | 0.691 | 0.5379 - 0.8450 | 0.66 | 0.692 | 0.886 | 0.36 | 0.886 | 0.66 | 0.756 | 0.599 | label-test |
|  | ExtraTrees | 0.803 | 0.852 | 0.7870 - 0.9174 | 0.811 | 0.787 | 0.885 | 0.673 | 0.885 | 0.811 | 0.846 | 0.636 | label-train |
|  | ExtraTrees | 0.667 | 0.723 | 0.5730 - 0.8738 | 0.638 | 0.769 | 0.909 | 0.37 | 0.909 | 0.638 | 0.75 | 0.658 | label-test |
| T2_multi-slice | SVM | 0.754 | 0.814 | 0.7396 - 0.8891 | 0.779 | 0.702 | 0.841 | 0.611 | 0.841 | 0.779 | 0.809 | 0.675 | label-train |
|  | SVM | 0.767 | 0.776 | 0.6236 - 0.9279 | 0.766 | 0.769 | 0.923 | 0.476 | 0.923 | 0.766 | 0.837 | 0.675 | label-test |
|  | RandomForest | 0.782 | 0.772 | 0.6876 - 0.8561 | 0.926 | 0.489 | 0.786 | 0.767 | 0.786 | 0.926 | 0.85 | 0.601 | label-train |
|  | RandomForest | 0.7 | 0.762 | 0.6235 - 0.9002 | 0.66 | 0.846 | 0.939 | 0.407 | 0.939 | 0.66 | 0.775 | 0.668 | label-test |
|  | ExtraTrees | 0.789 | 0.871 | 0.8125 - 0.9286 | 0.747 | 0.872 | 0.922 | 0.631 | 0.922 | 0.747 | 0.826 | 0.661 | label-train |
|  | ExtraTrees | 0.85 | 0.804 | 0.6409 - 0.9663 | 0.915 | 0.615 | 0.896 | 0.667 | 0.896 | 0.915 | 0.905 | 0.625 | label-test |
| DCE_multi-channel | SVM | 0.746 | 0.752 | 0.6648 - 0.8385 | 0.789 | 0.66 | 0.824 | 0.608 | 0.824 | 0.789 | 0.806 | 0.68 | label-train |
|  | SVM | 0.65 | 0.699 | 0.5479 - 0.8498 | 0.596 | 0.846 | 0.933 | 0.367 | 0.933 | 0.596 | 0.727 | 0.681 | label-test |
|  | RandomForest | 0.683 | 0.782 | 0.7030 - 0.8609 | 0.6 | 0.851 | 0.891 | 0.513 | 0.891 | 0.6 | 0.717 | 0.715 | label-train |
|  | RandomForest | 0.6 | 0.662 | 0.4883 - 0.8357 | 0.553 | 0.769 | 0.897 | 0.323 | 0.897 | 0.553 | 0.684 | 0.714 | label-test |
|  | ExtraTrees | 0.704 | 0.735 | 0.6504 - 0.8206 | 0.747 | 0.617 | 0.798 | 0.547 | 0.798 | 0.747 | 0.772 | 0.61 | label-train |
|  | ExtraTrees | 0.667 | 0.718 | 0.5567 - 0.8786 | 0.617 | 0.846 | 0.935 | 0.379 | 0.935 | 0.617 | 0.744 | 0.705 | label-test |
| DCE_multi-slice | SVM | 0.789 | 0.809 | 0.7303 - 0.8867 | 0.863 | 0.638 | 0.828 | 0.698 | 0.828 | 0.863 | 0.845 | 0.625 | label-train |
|  | SVM | 0.7 | 0.759 | 0.6400 - 0.8788 | 0.638 | 0.923 | 0.968 | 0.414 | 0.968 | 0.638 | 0.769 | 0.647 | label-test |
|  | RandomForest | 0.782 | 0.874 | 0.8179 - 0.9299 | 0.737 | 0.872 | 0.921 | 0.621 | 0.921 | 0.737 | 0.819 | 0.664 | label-train |
|  | RandomForest | 0.733 | 0.678 | 0.5038 - 0.8514 | 0.766 | 0.615 | 0.878 | 0.421 | 0.878 | 0.766 | 0.818 | 0.635 | label-test |
|  | ExtraTrees | 0.852 | 0.95 | 0.9180 - 0.9814 | 0.832 | 0.894 | 0.94 | 0.724 | 0.94 | 0.832 | 0.883 | 0.727 | label-train |
|  | ExtraTrees | 0.75 | 0.768 | 0.6158 - 0.9193 | 0.745 | 0.769 | 0.921 | 0.455 | 0.921 | 0.745 | 0.824 | 0.696 | label-test |

# 6. Sample Size Estimation Based on EPV

**Background**

In medical research, the EPV (events per variable) is used to evaluate the ratio of events to variables in regression models. It's crucial for sample size estimation. In this study, we used EPV to estimate the sample size for our model predicting Ki-67 expression in breast cancer.

**Variable Determination**

The model includes variables like traditional radiomics features from intratumoral, peritumoral regions (5mm and 10mm), and habitat regions, as well as deep learning features from T2WI and DCE-MRI sequences. After feature extraction and selection, 12 key features were retained for the fusion model.

**Sample Size Estimation**

Assuming the EPV should be at least 10:

events=EPV×number of variables

So,

events≥10×12=120

In the training set of 142 samples, 78 were Ki-67 high-expression (events) and 64 were low-expression. Thus, the training set had 78 events, giving an EPV of 6.5 (78/12). This indicates a potential overfitting risk.

**Overfitting Mitigation**

To enhance model stability and generalizability:

- **Feature Selection**: We used ICC, Z-score normalization, t-tests, Pearson correlations, and LASSO regression to retain the most predictive features and reduce the number of variables, thereby improving the EPV.
- **Cross-validation**: We employed 5-fold cross-validation and grid search during model training and evaluation to optimize performance and minimize overfitting.
- **External Validation**: An independent external validation set from another center was used to assess the model's performance, ensuring its external validity and generalizability.

**Multicenter Data Considerations**

Data from two centers were included to enhance sample diversity and representativeness. We accounted for potential heterogeneity in multicenter data through proper sample allocation and statistical methods, ensuring reliable results from both combined and center-specific analyses.

**Conclusion**

Based on EPV, the sample size was estimated. Although the training set's EPV was below 10, measures like feature selection, cross-validation, and external validation enhanced model stability and generalizability. The final sample size was 254 patients (142 in the training set, 60 in the internal validation set, and 52 in the external validation set), providing a solid foundation for the study and ensuring statistically and clinically significant results.
